# Supplementary material for: Electrochemically directed synthesis of TiC nanotube arrays for aqueous zinc-ion batteries
Source: Royal Society of Chemistry journal article supplement (doi:10.1039/d4ta07582j), 2025-01-01
Supplement: d4ta07582j1.pdf [file d4ta07582j1.pdf]

## Supporting Information

### Electrochemically directed synthesis of TiC nanotube arrays for aqueous zinc-ion batteries

Tongxiang Ma\*, Xiangyan Chen, Qingyu Li

Northwest Institute for Non-Ferrous Metal Research, Xian 710016, China

\* Corresponding author.

E-mail address: tongxiang.ma@163.com (Tongxiang Ma)

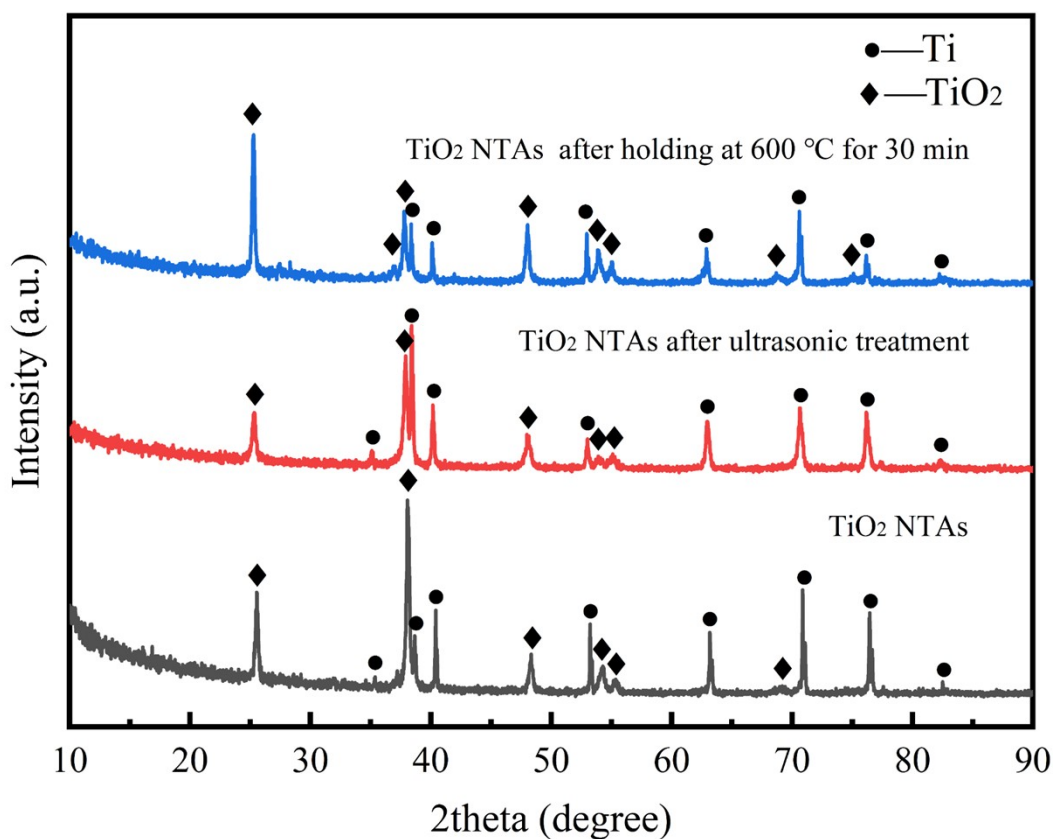

Figure.S1 XRD spectra of TiO<sub>2</sub> NTAs

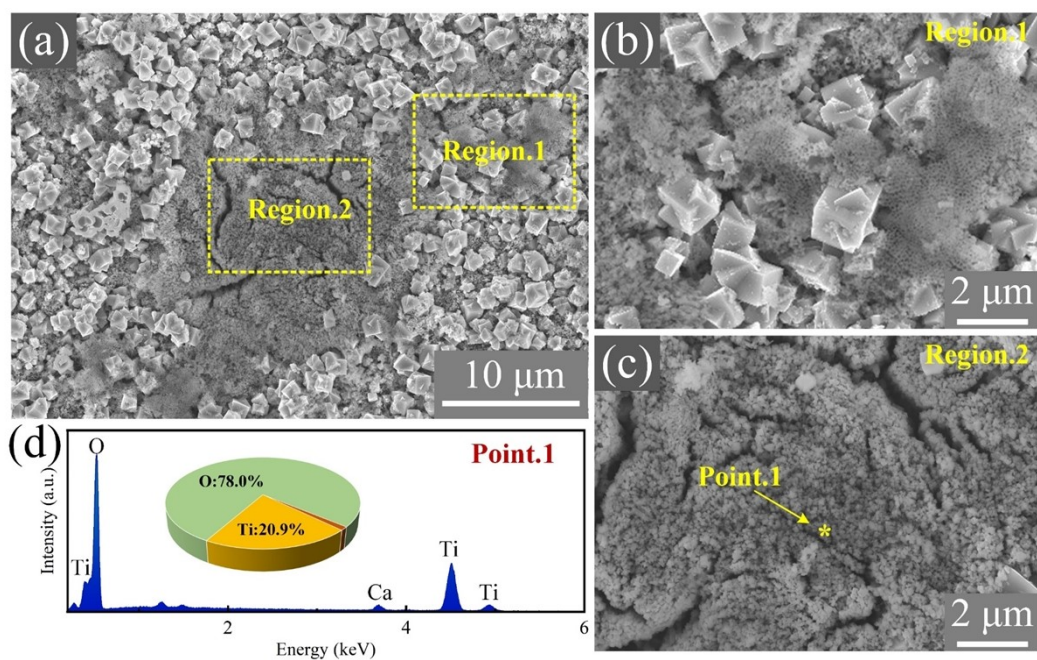

**Figure.S2** (a-c) SEM image of the product after soaking in molten salt for 3 min. (d) EDS of the product after soaking in molten salt for 3 min.

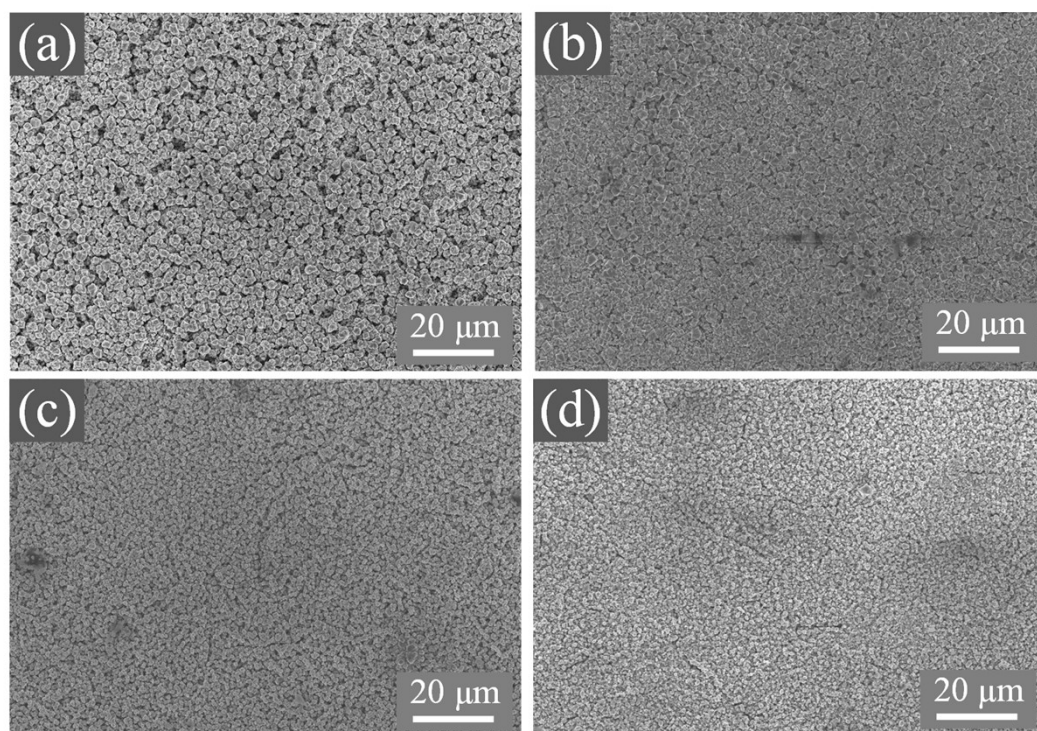

**Figure.S3** SEM image of the product after soaking in different molten salts for 30 min: (a) untreated; (b) add 1 mol% CaO after pre-electrolysis for 12 h; (c) pre-electrolysis for 12 h; (d) add 0.1 mol% Li<sub>2</sub>CO<sub>3</sub> after pre-electrolysis for 12 h.

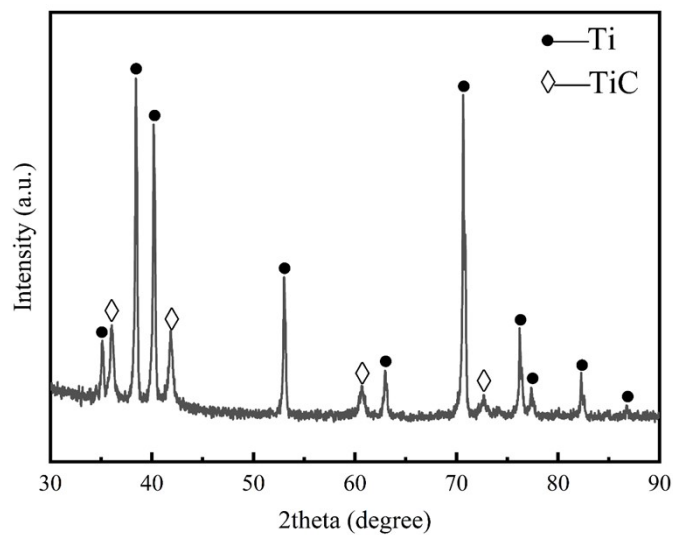

**Figure.S4** XRD pattern of the product after electrolysis for 30 min in LiCl–CaCl<sub>2</sub>–KCl (molar ratio: 5:2:3) molten salt.

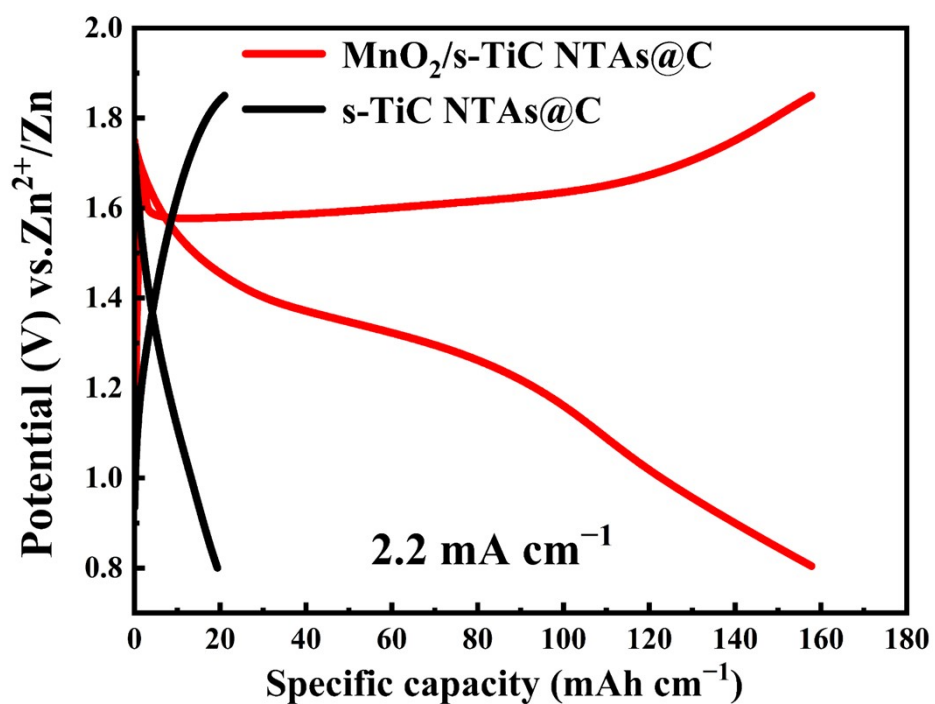

**Figure.S5** GCD curves of the bare s-TiC NTAs@C and MnO<sub>2</sub>/s-TiC NTAs@C at a current density of 2.2 mA cm<sup>-2</sup>.

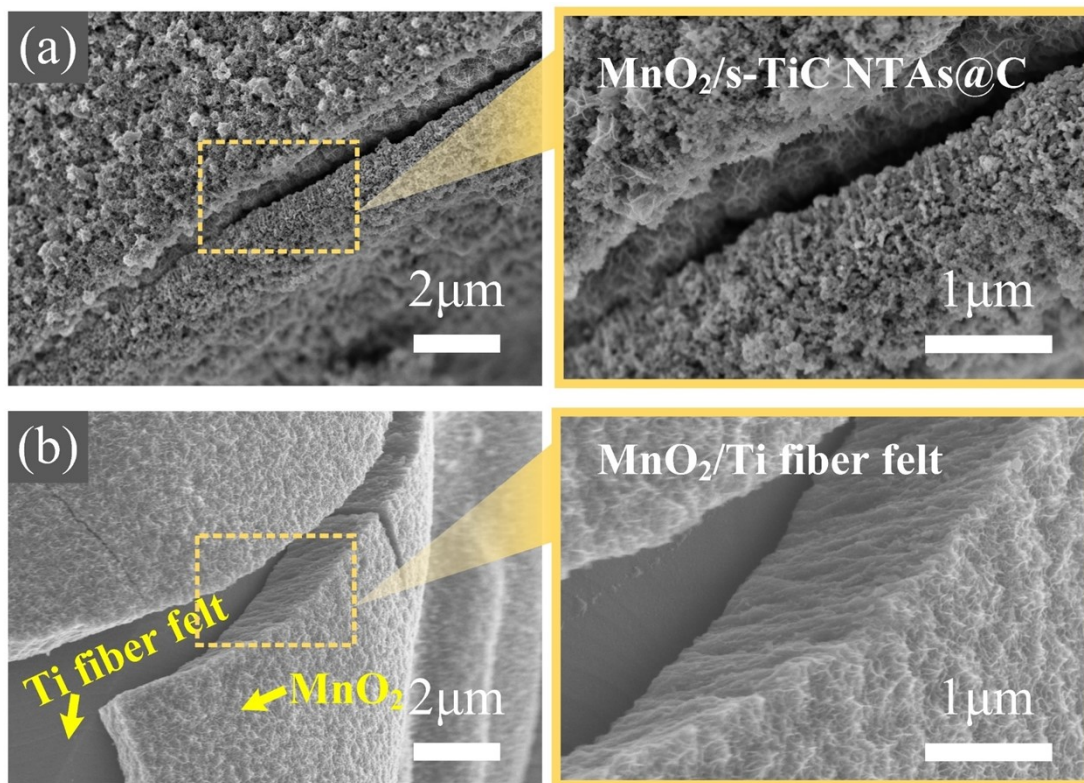

**Figure.S6** Cross-sectional SEM image (a) MnO<sub>2</sub>/s-TiC NTAs@C and (b) MnO<sub>2</sub>/Ti fiber felt
